# Supplementary material for: Platinum and vanadate Bioactive Complexes of Glycoside Naringin and Phenolates
Source: publisher site journal article supplement (doi:10.1515/chem-2017-0022), 2017-01-01
Supplement: Supplementary file 1 [file chem-2017-0022_sm.pdf]

## Supplementary Information

## Open Access

Ahmed E. Fazary\*, Yi-Hsu Ju, Ayed S. Al-Shihri, Mutasem Z. Bani-Fwaz, Mohammad Y. Alfaifi, Mohammed A. Alshehri, Kamel A. Saleh, Serag Eldin I. Elbehairi, Khaled F Fawy, Hisham S. M. Abd-Rabboh

# Supplement: Platinum and vanadate Bioactive Complexes of Glycoside Naringin and Phenolates

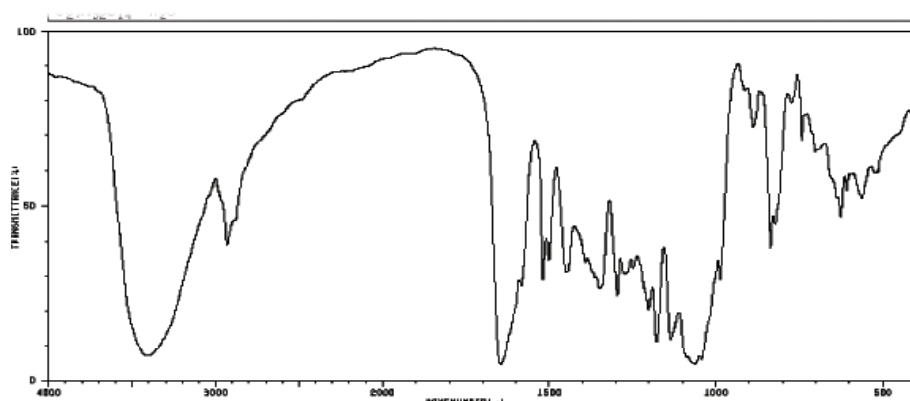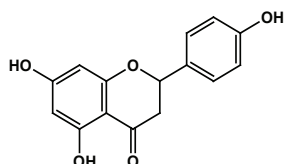

**Supplementary Figure 1.** IR spectral patterns of naringin NRG and its molecular structure (SDBS data base)

**\*Corresponding author: Ahmed E. Fazary:** Chemistry Department, Faculty of Science, King Khalid University, Abha 9004, Kingdom of Saudi Arabia; Applied Research Sector, Egyptian Organization for Biological Products and Vaccines (VACSERA Holding Company), 51 Wezaret El-Zeraa St., Agouza, Giza, Egypt, E-mail: aefazary@gmail.com; afazary@kku.edu.sa

**Ayed S. Al-Shihri, Mutasem Z. Bani-Fwaz, Khaled F Fawy:** Chemistry Department, Faculty of Science, King Khalid University, Abha 9004, Kingdom of Saudi Arabia

**Serag Eldin I. Elbehairi:** Applied Research Sector, Egyptian Organization for Biological Products and Vaccines (VACSERA Holding Company), 51 Wezaret El-Zeraa St., Agouza, Giza, Egypt

**Yi-Hsu Ju:** Chemical Engineering Department, National Taiwan University of Science and Technology, 43 Keelung Rd., Taipei, Taiwan

**Mohammad Y. Alfaifi, Mohammed A. Alshehri, Kamel A. Saleh:** Biology Department, Faculty of Science, King Khalid University, Abha 9004, Kingdom of Saudi Arabia

**Hisham S. M. Abd-Rabboh:** Department of Chemistry, Faculty of Science, Ain Shams University, Cairo 11566, Egypt

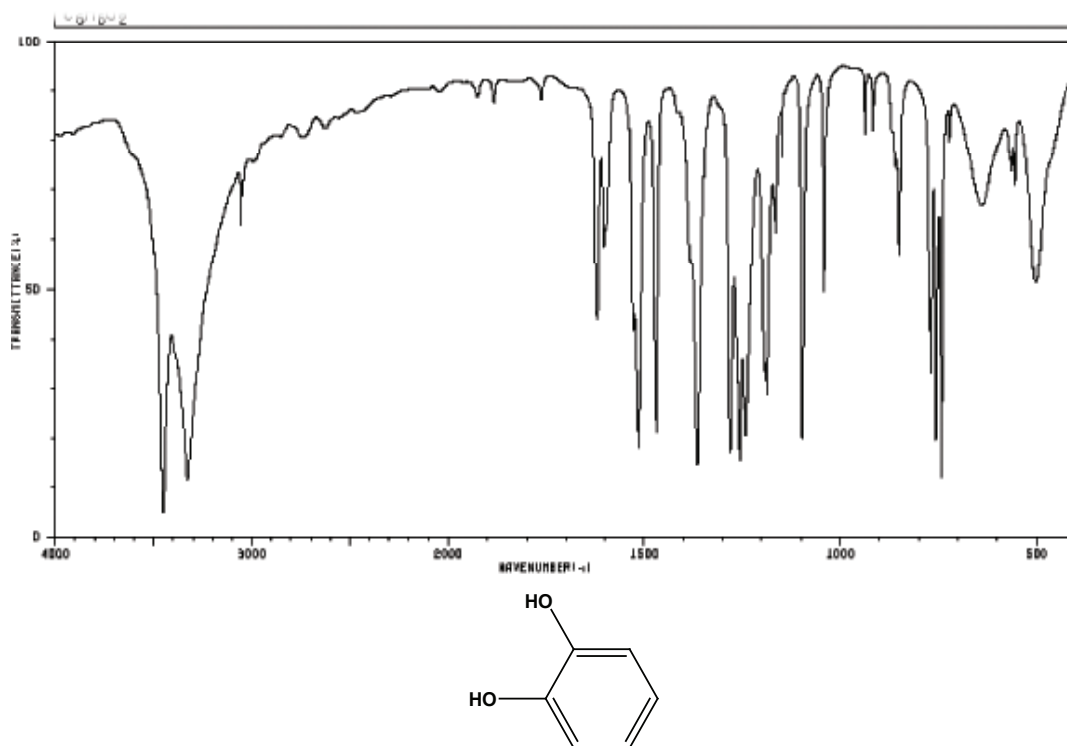

**Supplementary Figure 2.** IR spectral patterns of Catechol (CC), and its molecular structure (SDBS data base)

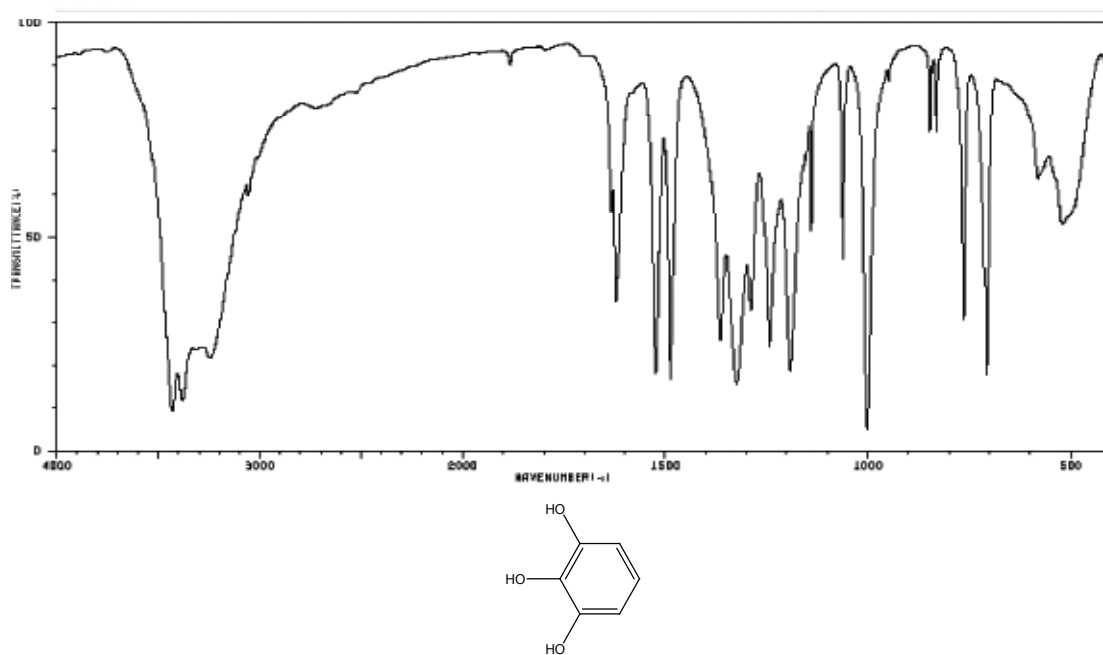

**Supplementary Figure 3.** IR spectral patterns of Pyrogallol (PYG), and its molecular structure (SDBS data base)

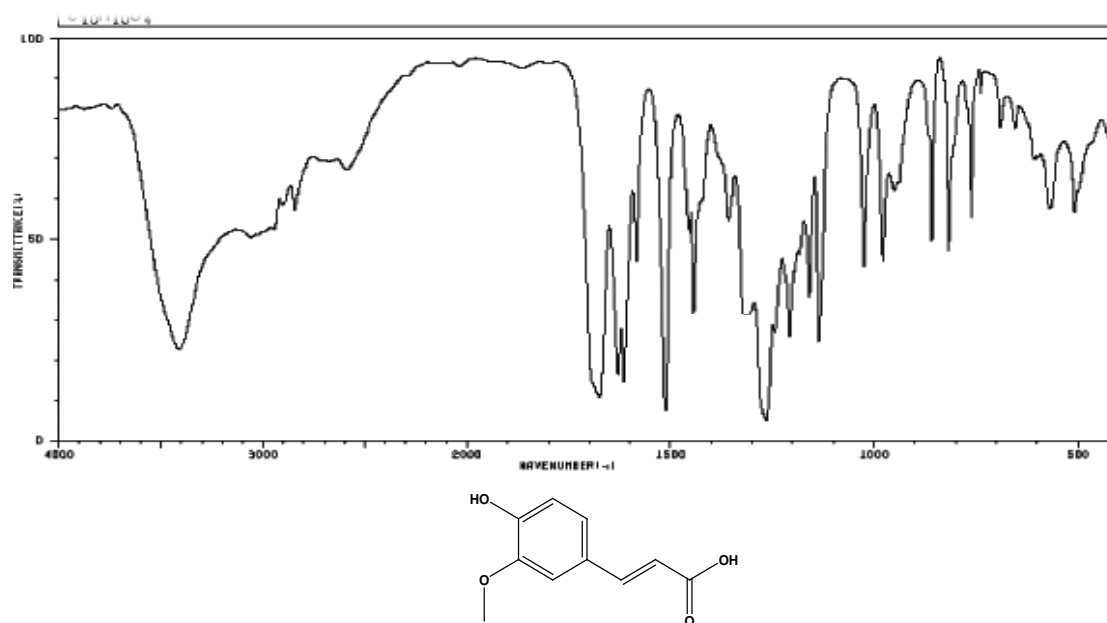

**Supplementary Figure 4.** IR spectral patterns of Ferulic acid (FA), and its molecular structure (SDBS data base)

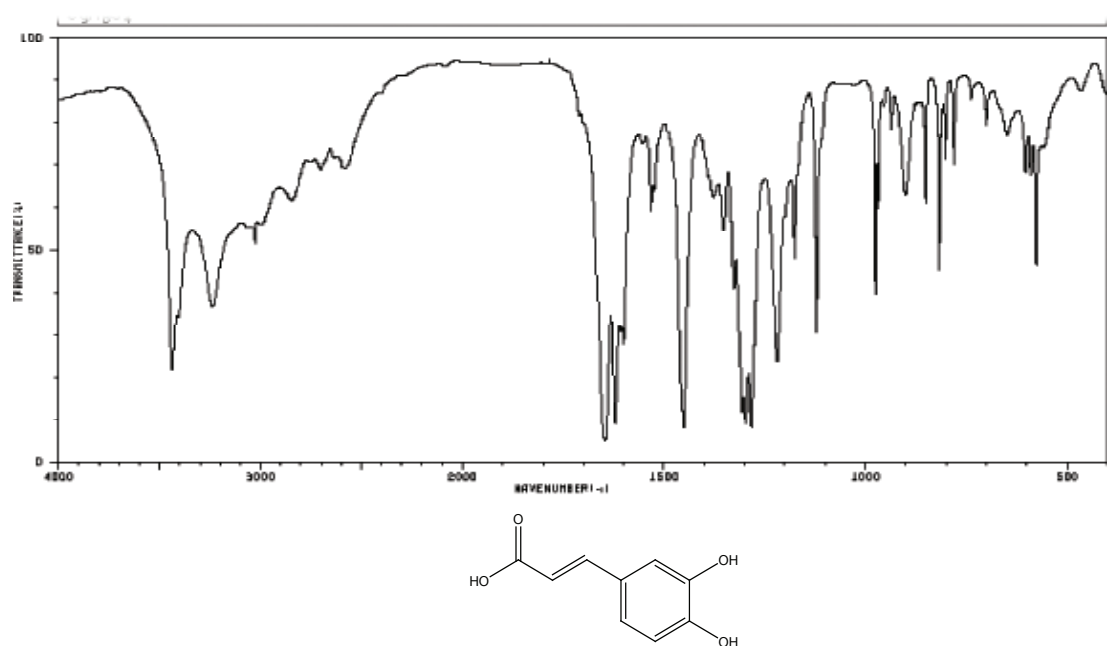

**Supplementary Figure 5.** IR spectral patterns of Caffeic acid (CA), and its molecular structure (SDBS data base)

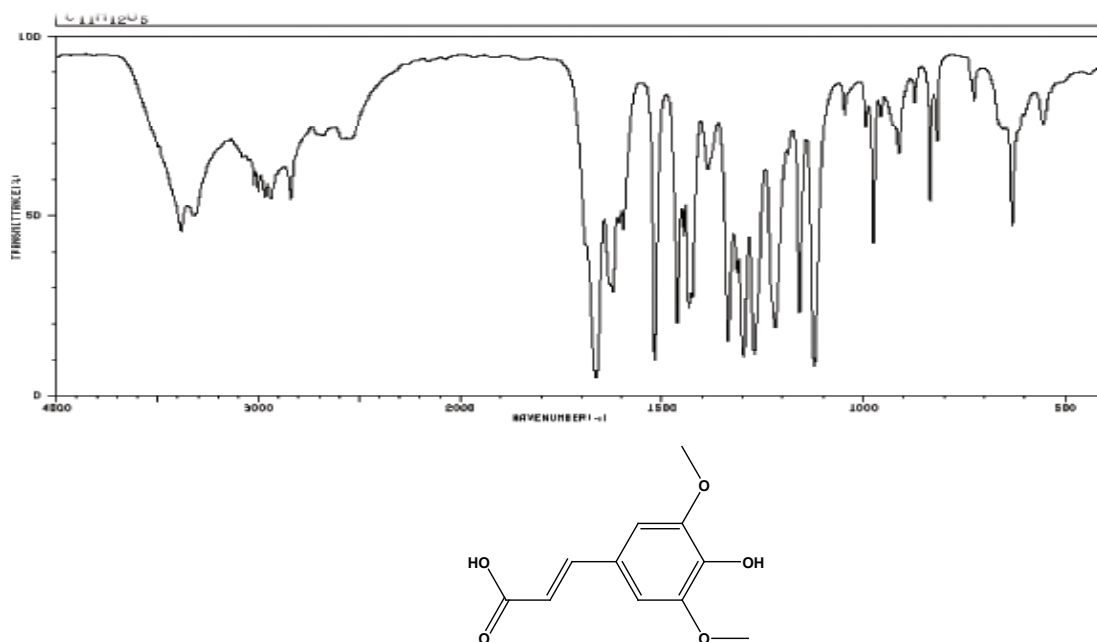

**Supplementary Figure 6.** IR spectral patterns of Supplementary Figure naptic acid (SA), and its molecular structure (SDBS data base)

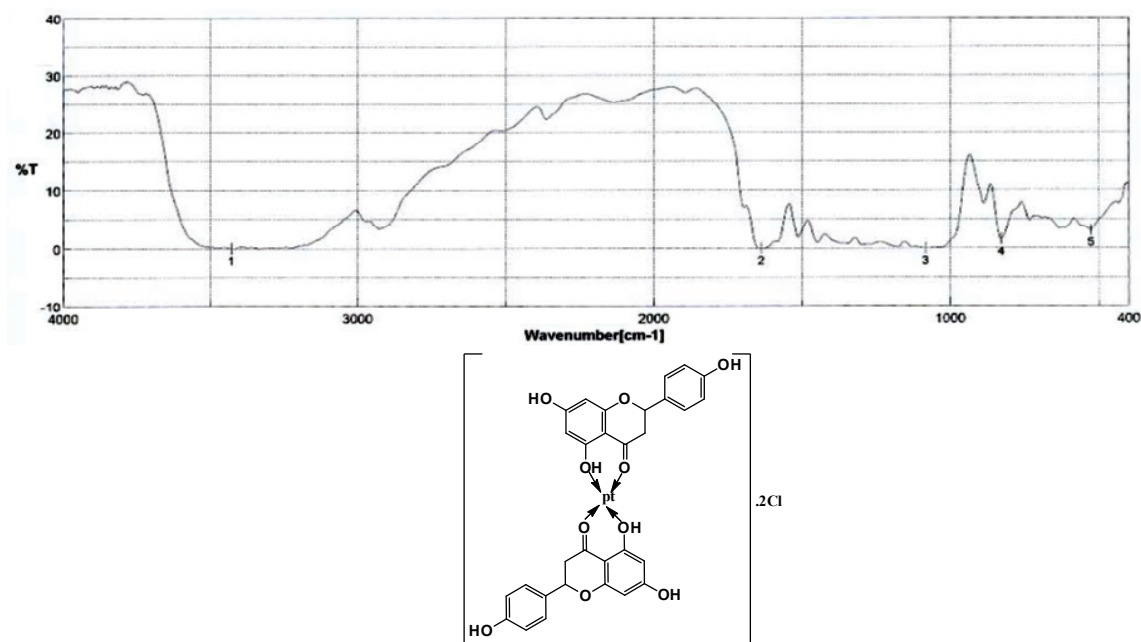

**Supplementary Figure 7.** IR spectral patterns of PtNRG<sub>2</sub> and its plauSupplementary Figure ble molecular structure

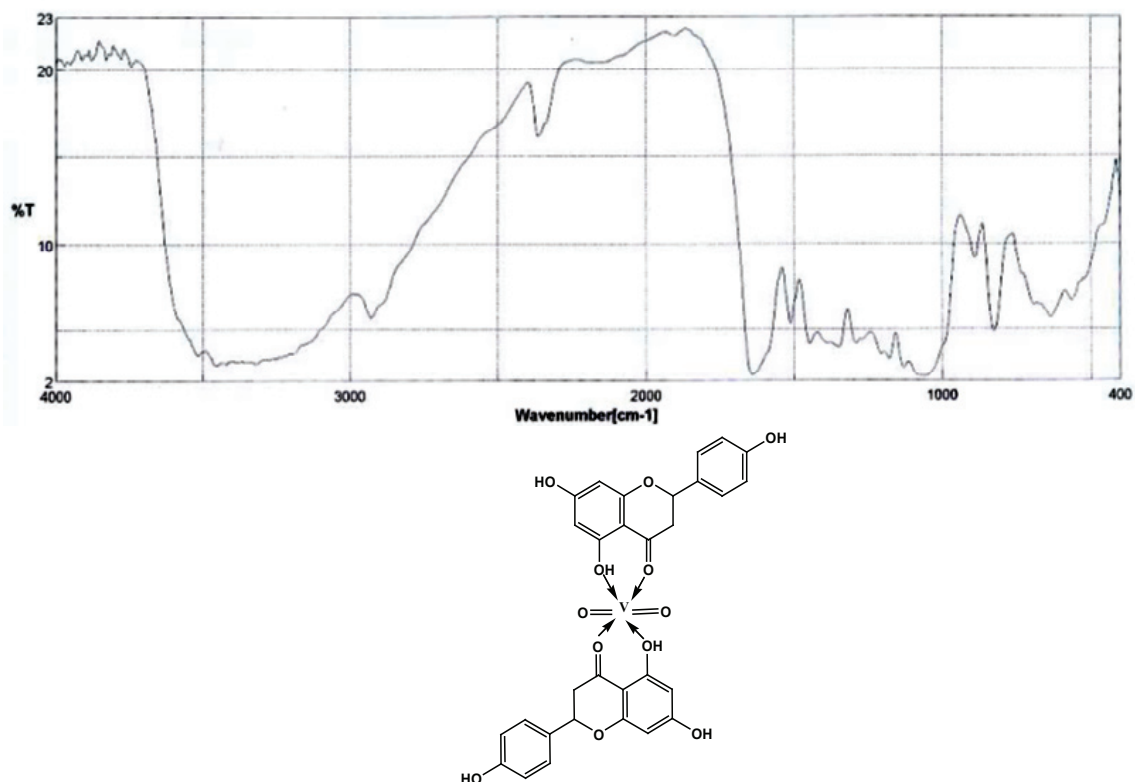

**Supplementary Figure 8.** IR spectral patterns of VNRG<sub>2</sub> and its plausible molecular structure

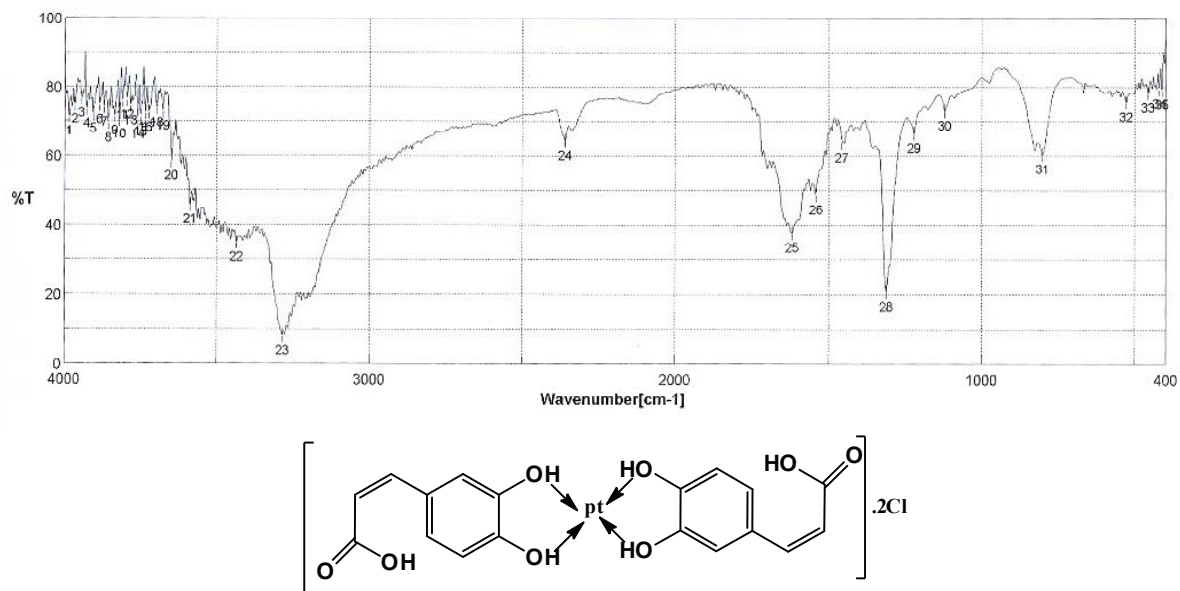

**Supplementary Figure 9.** IR spectral patterns of PtCA<sub>2</sub> and its plausible molecular structure

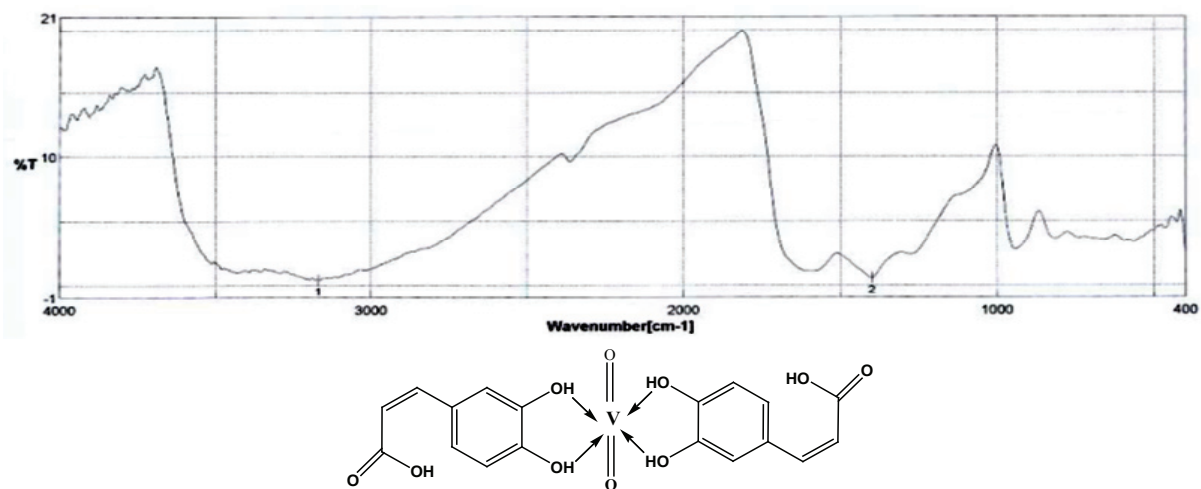

Supplementary Figure 10. IR spectral patterns of VCA<sub>2</sub> and its plausible molecular structure

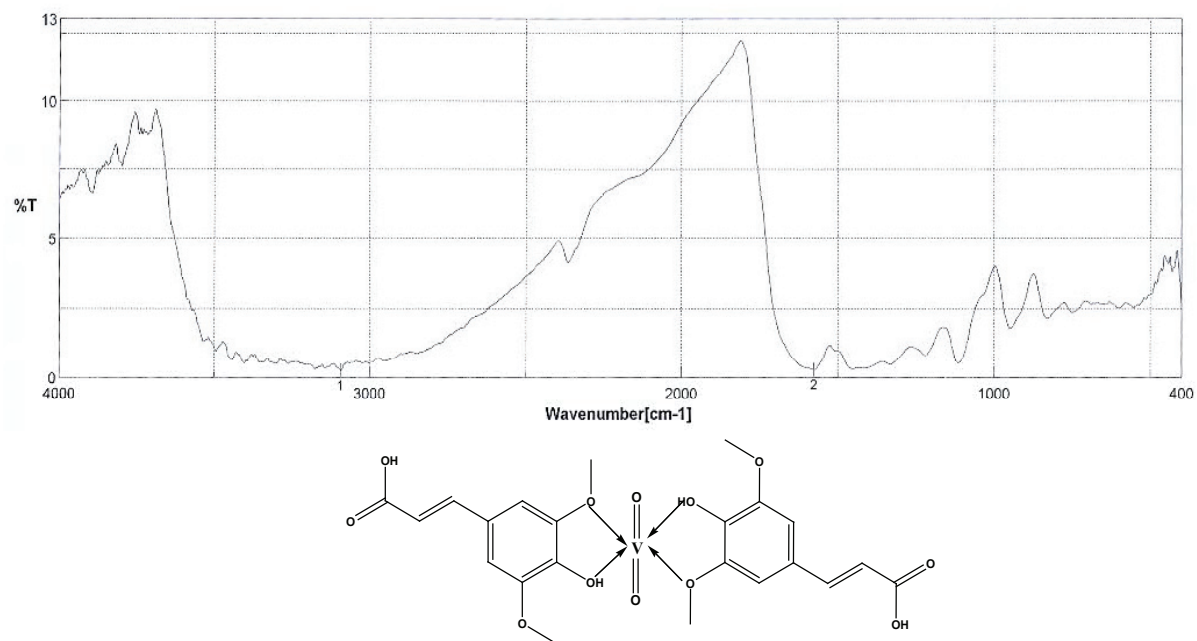

Supplementary Figure 11. IR spectral patterns of VSA<sub>2</sub> and its plausible molecular structure

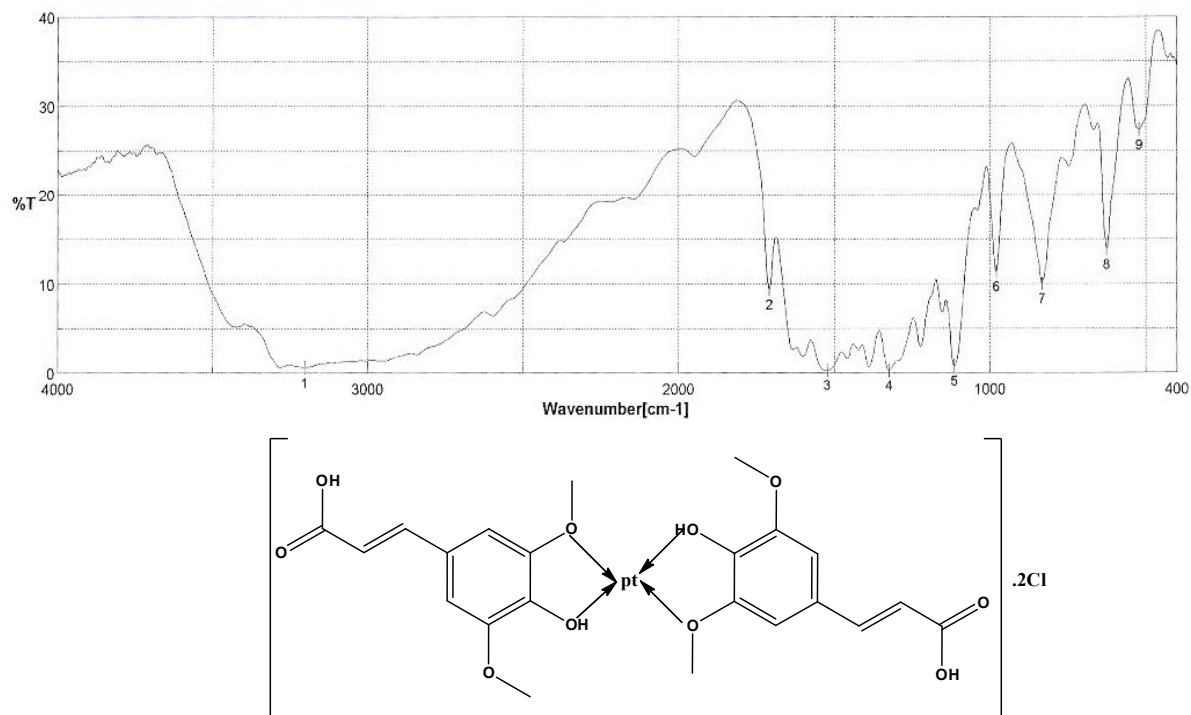

**Supplementary Figure 12.** IR spectral patterns of PtSA<sub>2</sub> and its plausible molecular structure

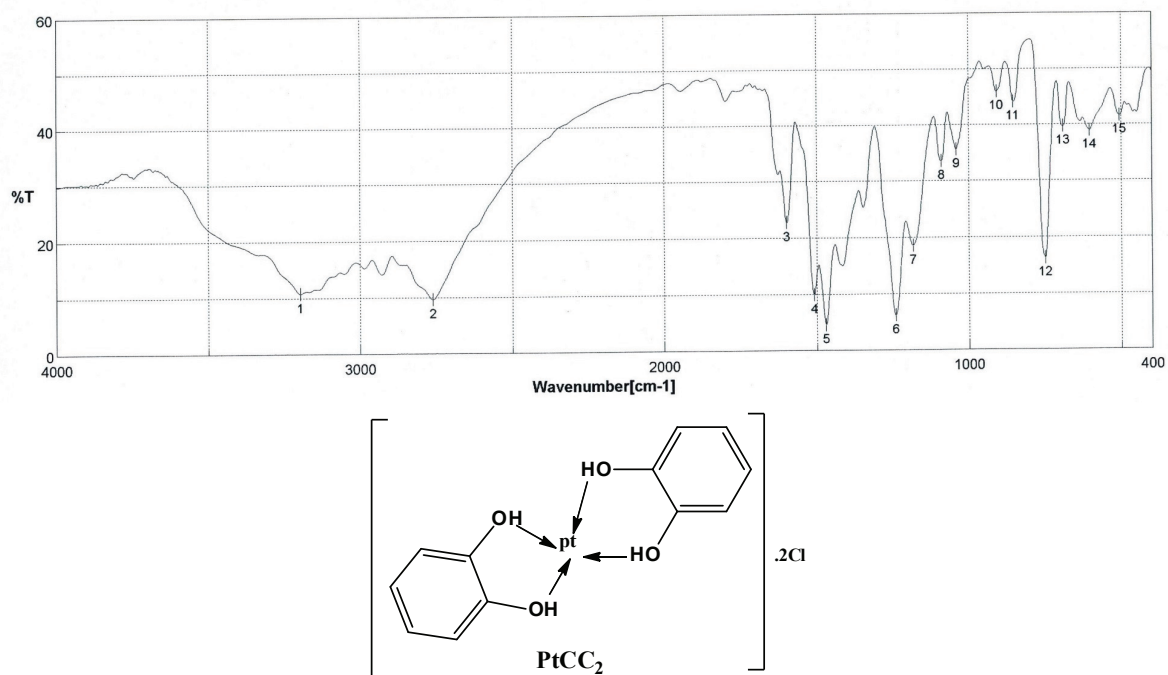

**Supplementary Figure 13.** IR spectral patterns of PtCC<sub>2</sub> and its plausible molecular structure

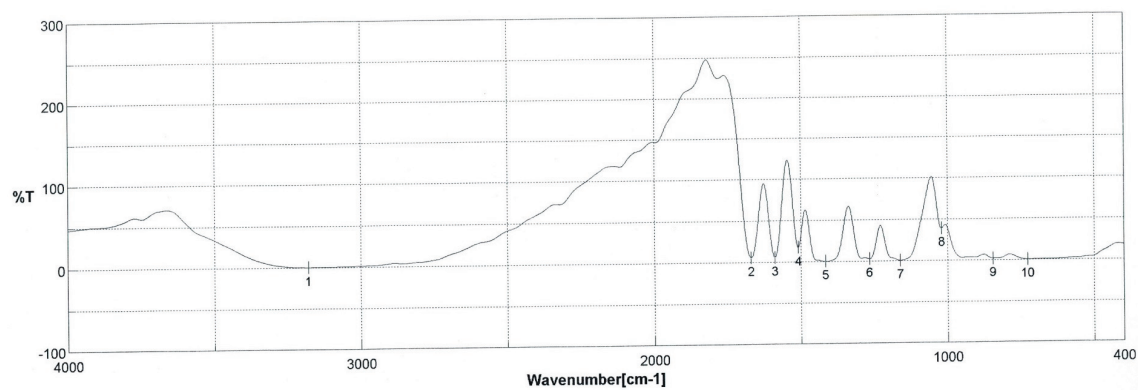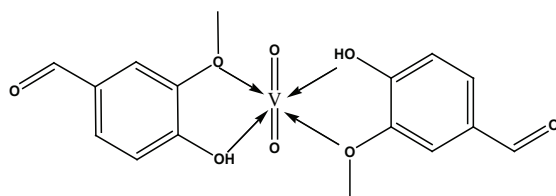

Supplementary Figure 14. IR spectral patterns of VVA<sub>2</sub> and its plausible molecular structure

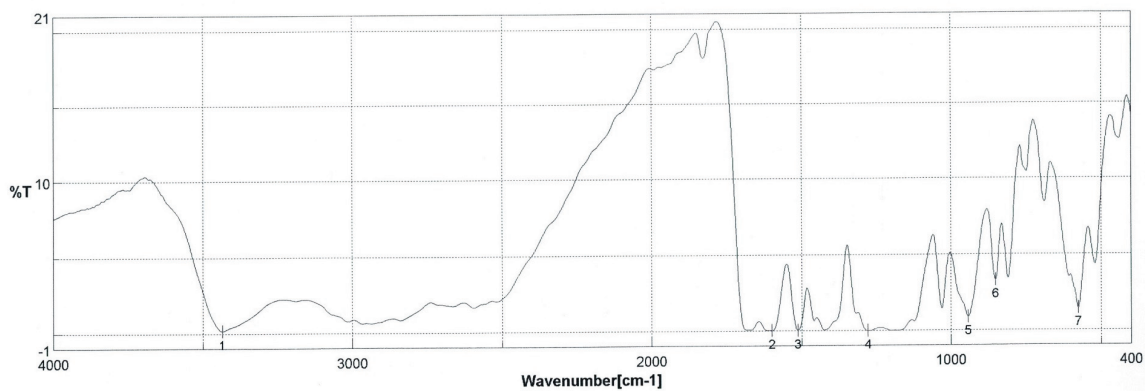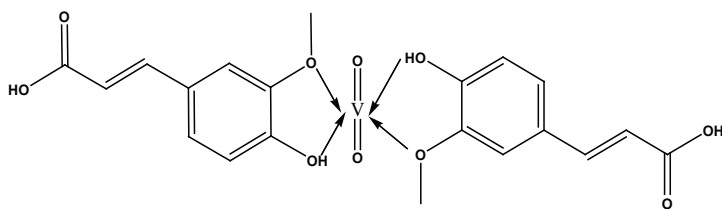

Supplementary Figure 15. IR spectral patterns of VFA<sub>2</sub> and its plausible molecular structure



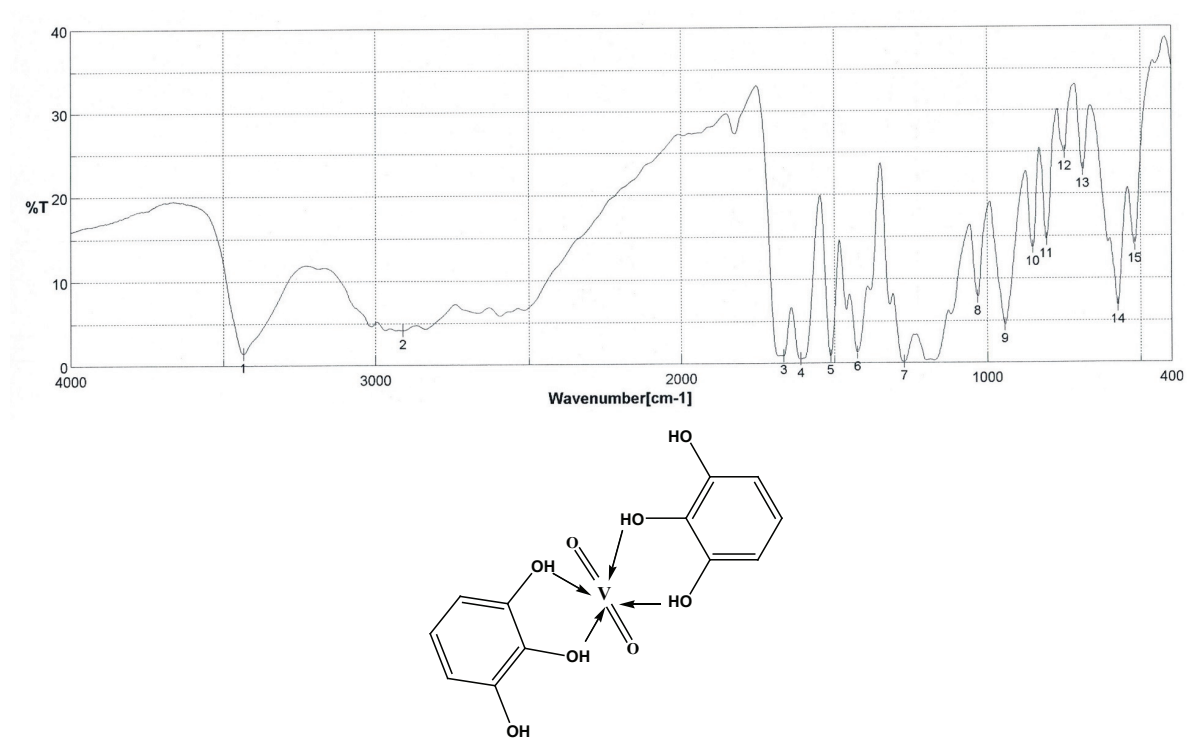

Supplementary Figure 16. IR spectral patterns of VPYG<sub>2</sub> and its chemical molecular structure

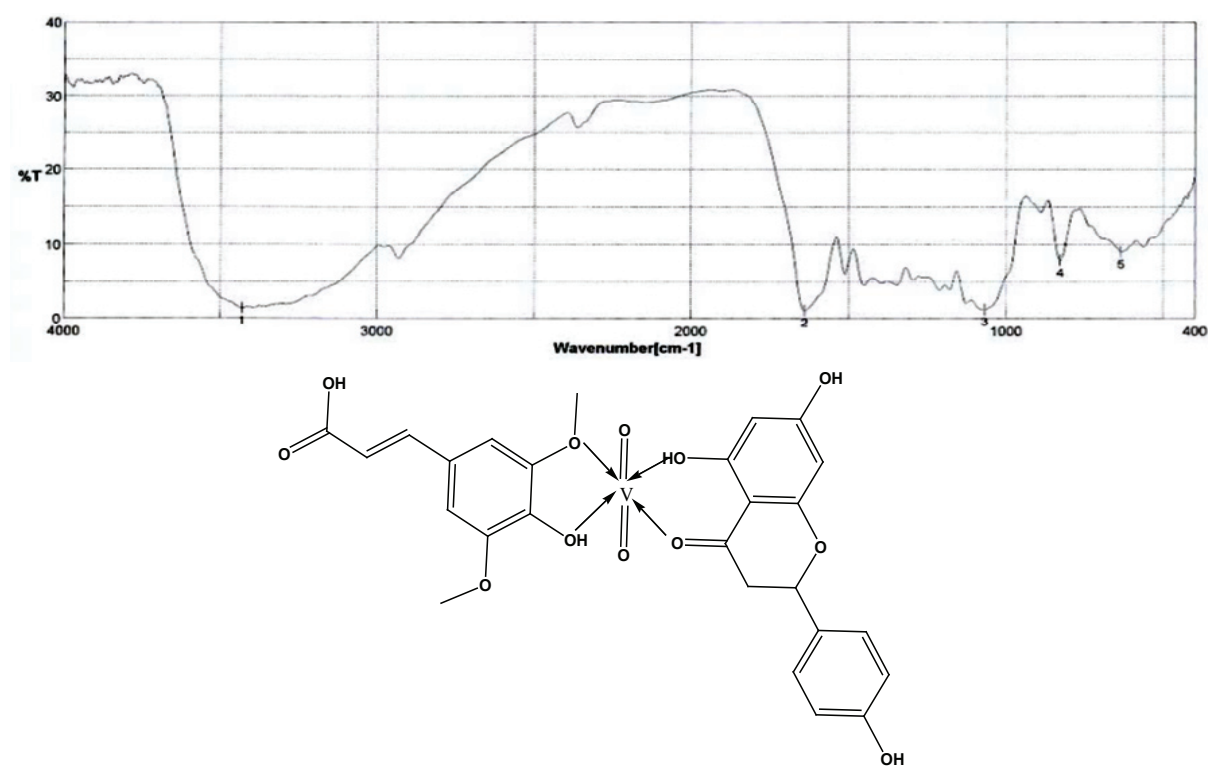

Supplementary Figure 17. IR spectral patterns of VNRSa and its chemical molecular structure

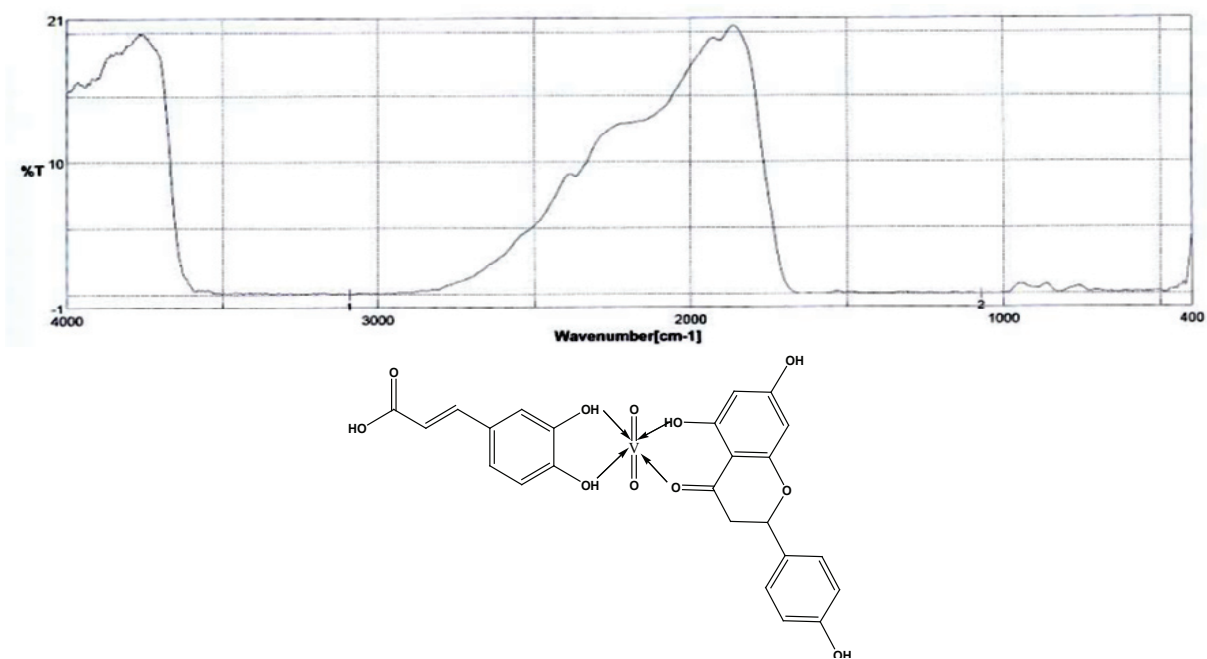

Supplementary Figure 18. IR spectral patterns of VNRGCA and its chemical molecular structure

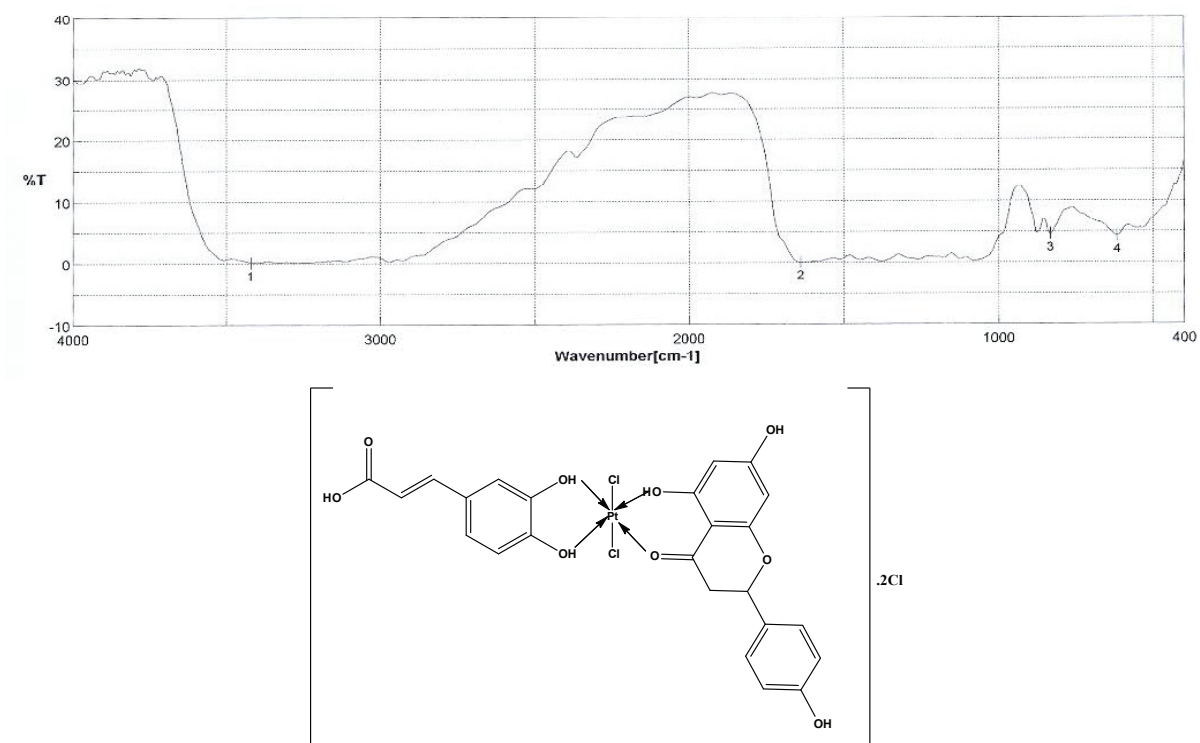

Supplementary Figure 19. IR spectral patterns of PtNRGCA and its chemical molecular structure

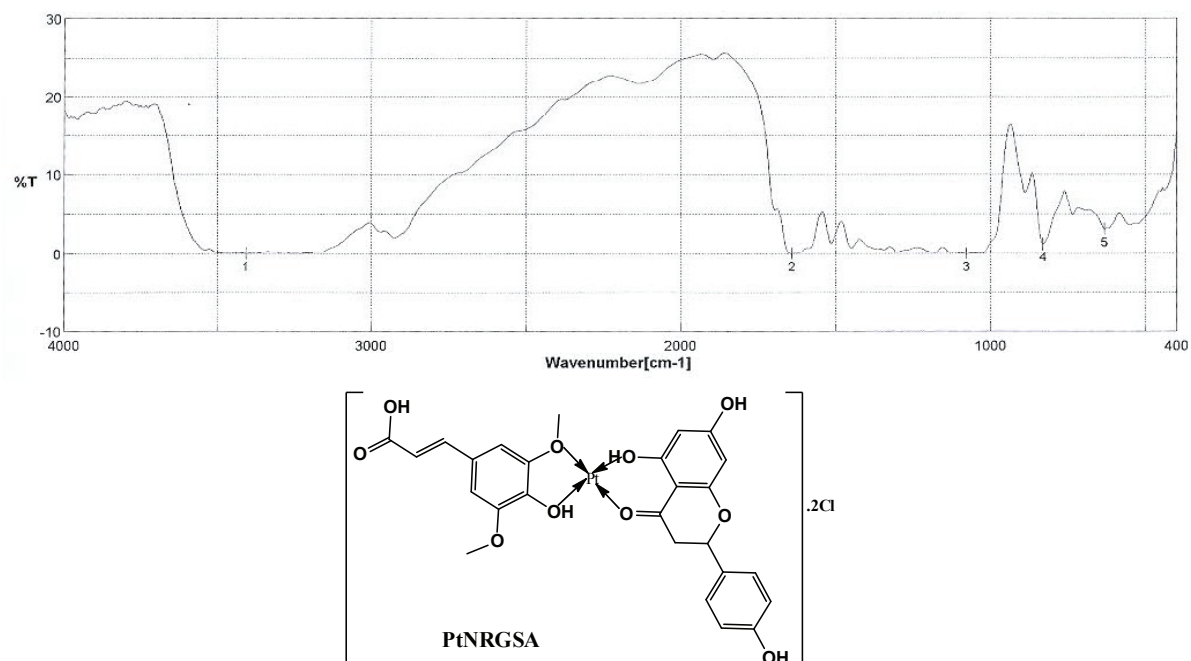

**Supplementary Figure 20.** IR spectral patterns of PtNRGSA and its plauSupplementary Figure ble molecular structure

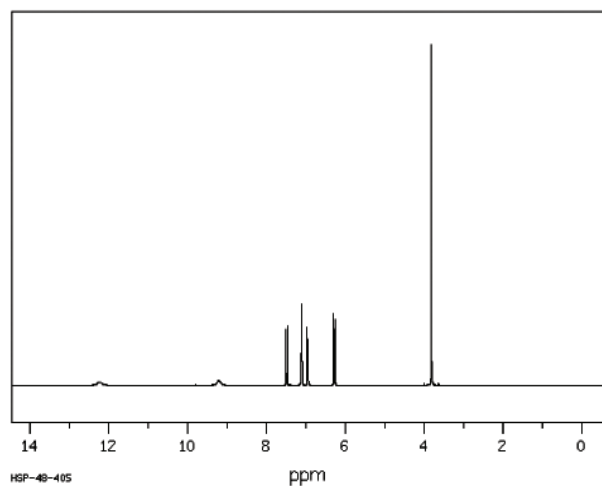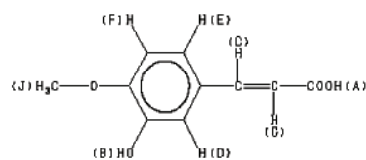

| Assign. | Shift(ppm) |
|---------|------------|
| A       | 12.2       |
| B       | 9.2        |
| C       | 7.484      |
| D       | 7.11       |
| E       | 7.18       |
| F       | 6.956      |
| G       | 6.278      |
| J       | 3.819      |

**Supplementary Figure 21.** <sup>1</sup>H NMR spectral patterns of Ferulic acid (FA) and its plauSupplementary Figure ble molecular structure (SDBS data base)

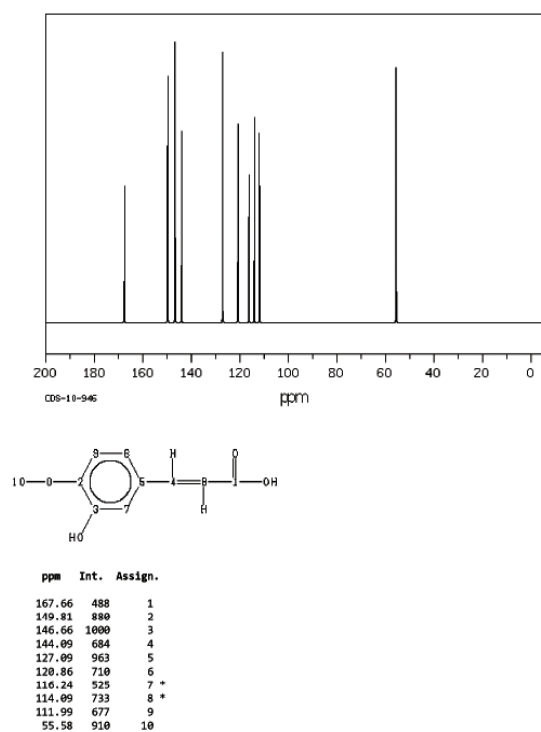

**Supplementary Figure 22.**  $^{13}\text{C}$  NMR spectral patterns of Ferulic acid (FA) and its plauSupplementary Figure ble molecular structure(SDBS data base)

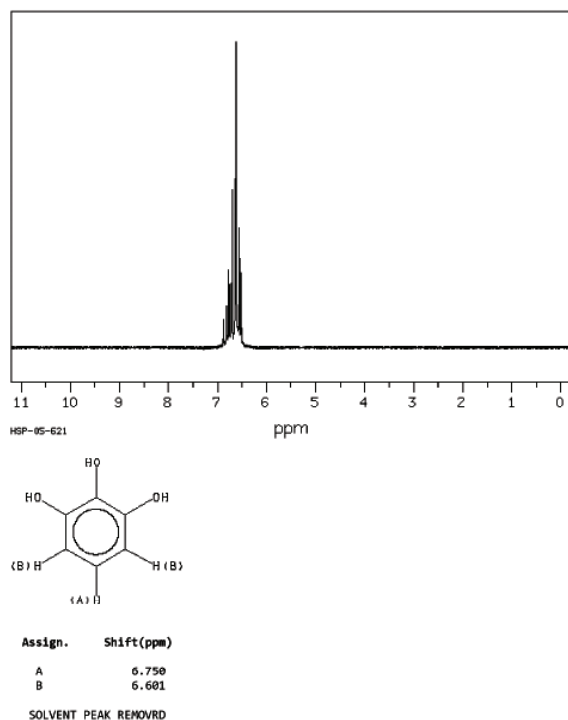

**Supplementary Figure 23.**  $^1\text{H}$  NMR spectral patterns of Pyrogallol (PYG) and its plauSupplementary Figure ble molecular structure(SDBS data base)

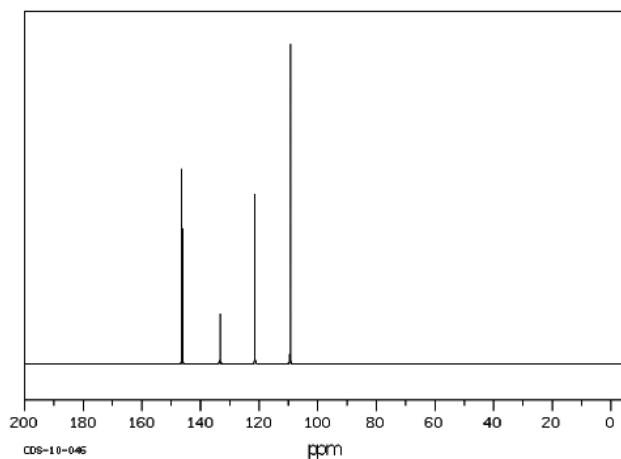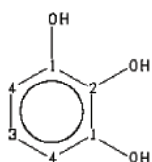

| ppm    | Int. | Assign. |
|--------|------|---------|
| 146.26 | 605  | 1       |
| 133.29 | 155  | 2       |
| 121.41 | 530  | 3       |
| 109.34 | 1000 | 4       |

**Supplementary Figure 24.**  $^{13}\text{C}$  NMR spectral patterns of Pyrogallol (PYG) and its plauSupplementary Figure ble molecular structure(SDBS data base)

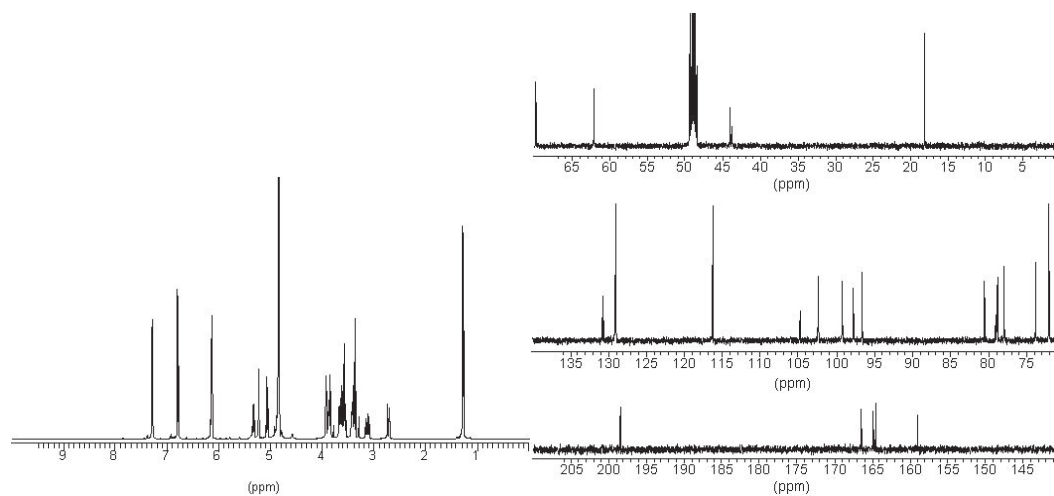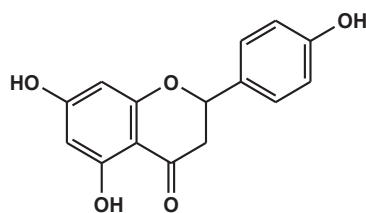

**Supplementary Figure 25.**  $^1\text{H}$  and  $^{13}\text{C}$  - NMR spectral patterns of naringin (NRG) and its plauSupplementary Figure ble molecular structure

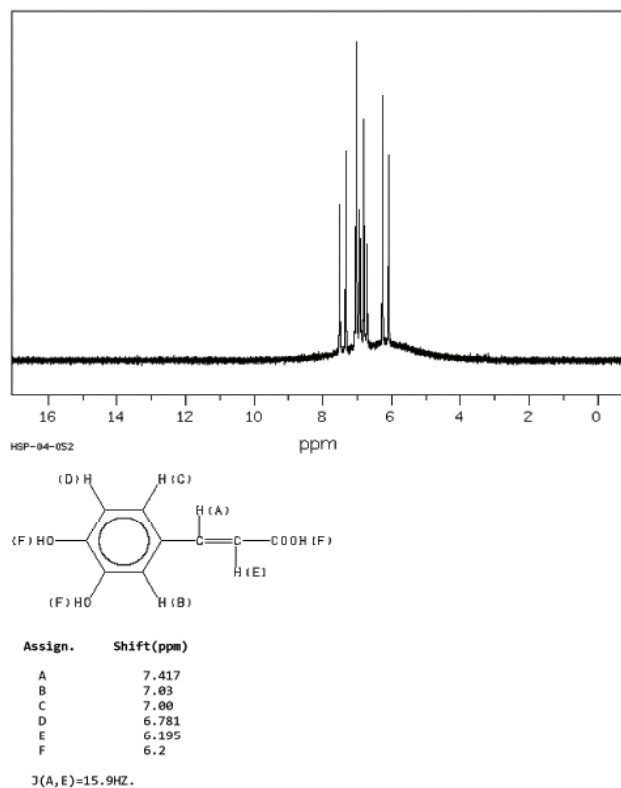

**Supplementary Figure 26.**  $^1\text{H}$  NMR spectral patterns of Caffeic acid (CA) and its plauSupplementary Figure ble molecular structure (SDBS data base)

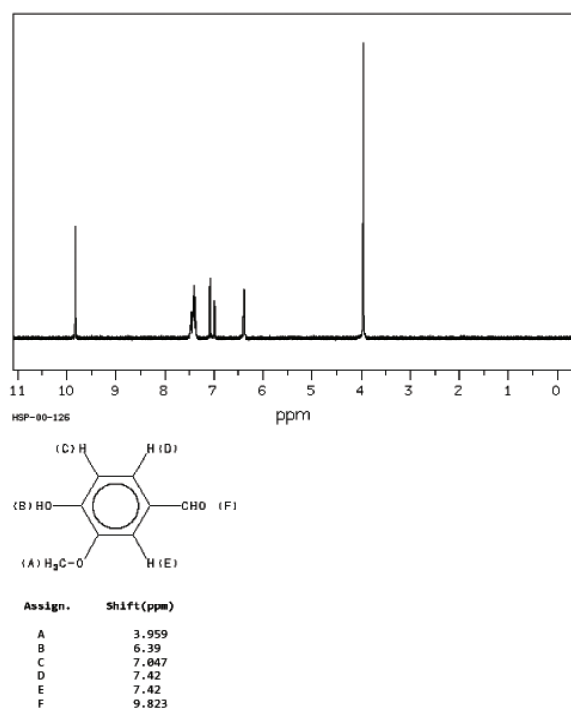

**Supplementary Figure 27.**  $^1\text{H}$  NMR spectral patterns of Vanillin (VA) and its plauSupplementary Figure ble molecular structure (SDBS data base)

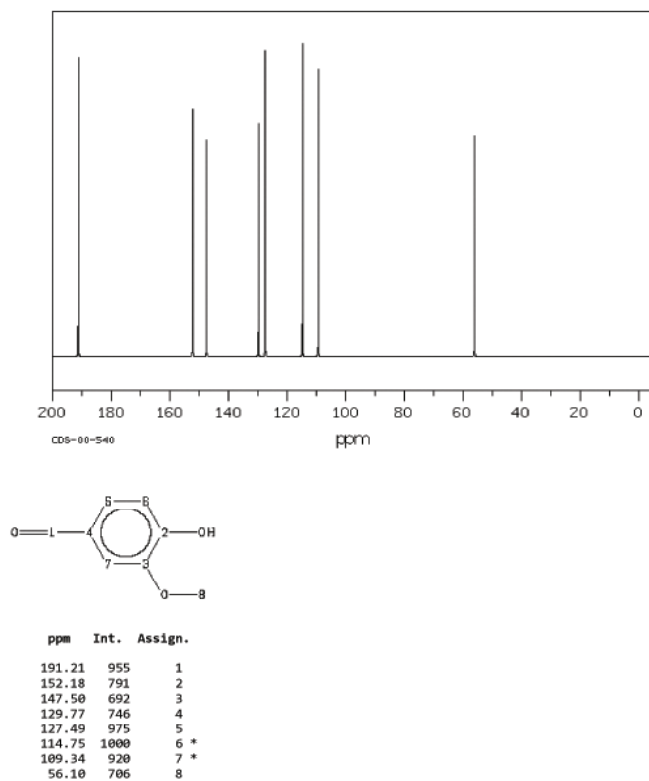

**Supplementary Figure 28.**  $^{13}\text{C}$  NMR spectral patterns of Vanillic Acid (VA) and its plauSupplementary Figure ble molecular structure (SDBS data base)

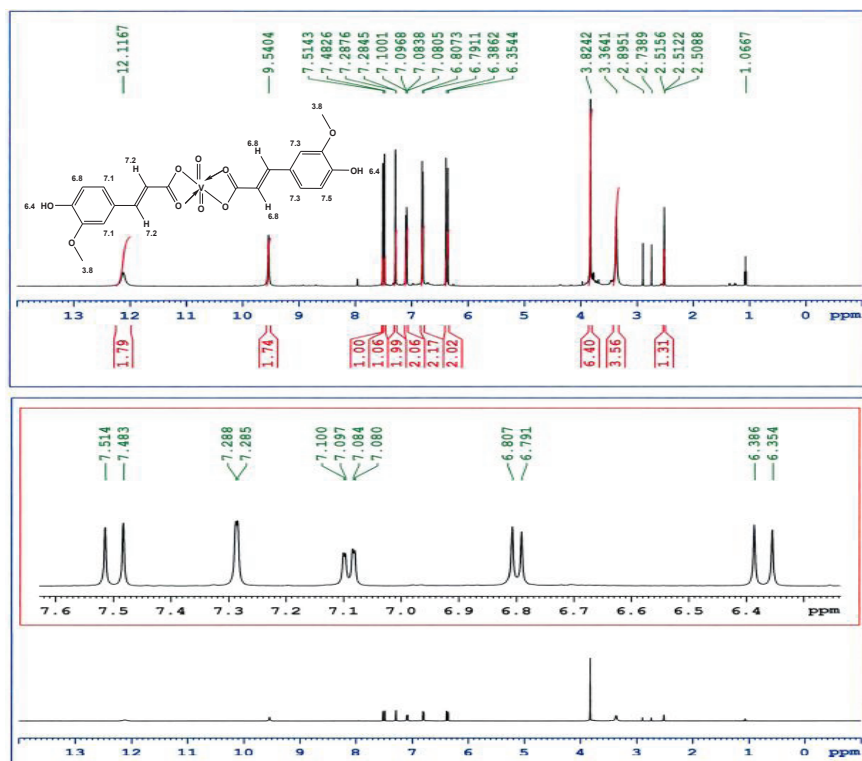

**Supplementary Figure 29.**  $^1\text{H}$  NMR spectral patterns of VFA<sub>2</sub> and its plauSupplementary Figure ble molecular structure

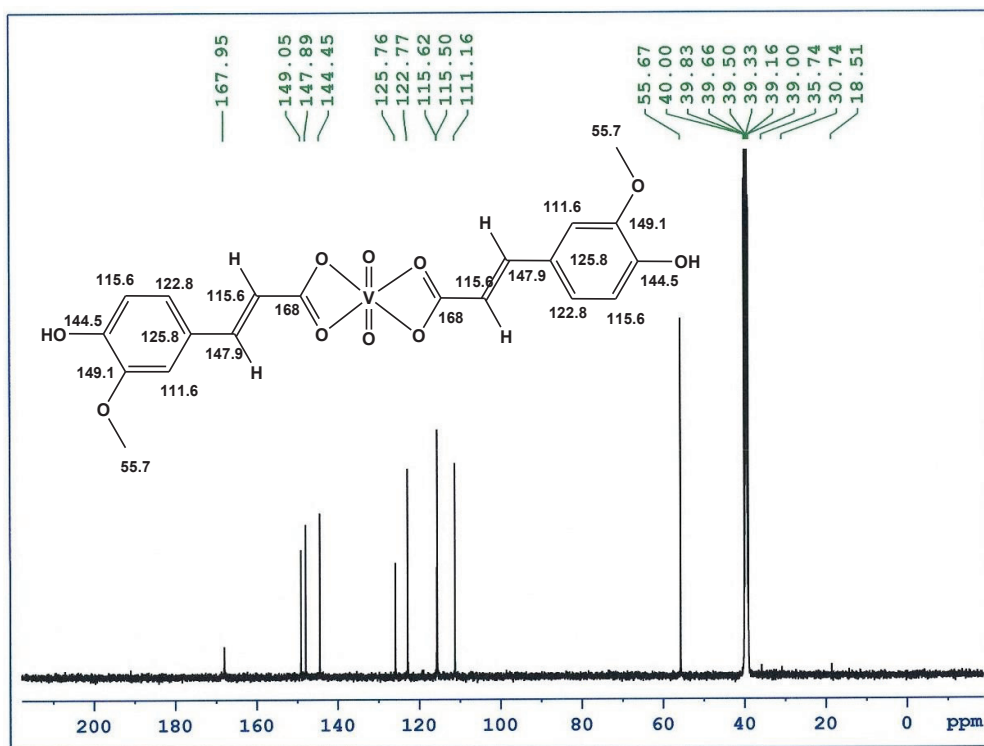

Supplementary Figure 30. <sup>13</sup>C NMR spectral patterns of VFA<sub>2</sub> and its plauSupplementary Figure ble molecular structure

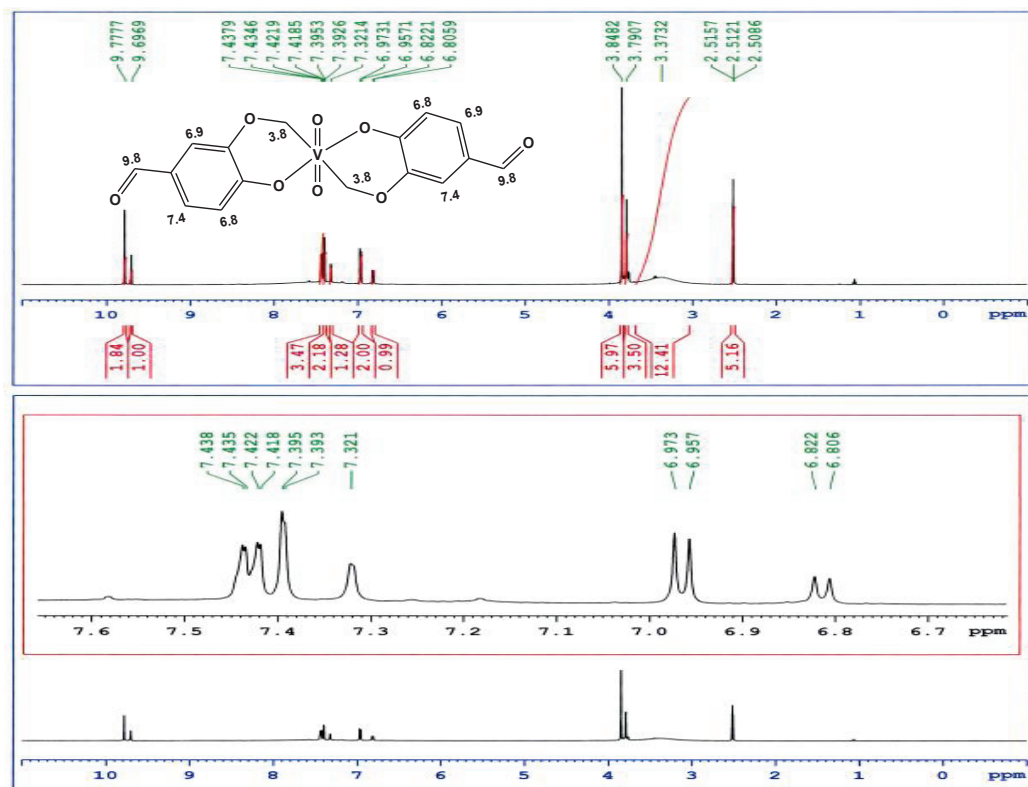

Supplementary Figure 31. <sup>1</sup>H NMR spectral patterns of VVA<sub>2</sub> and its plauSupplementary Figure ble molecular structure



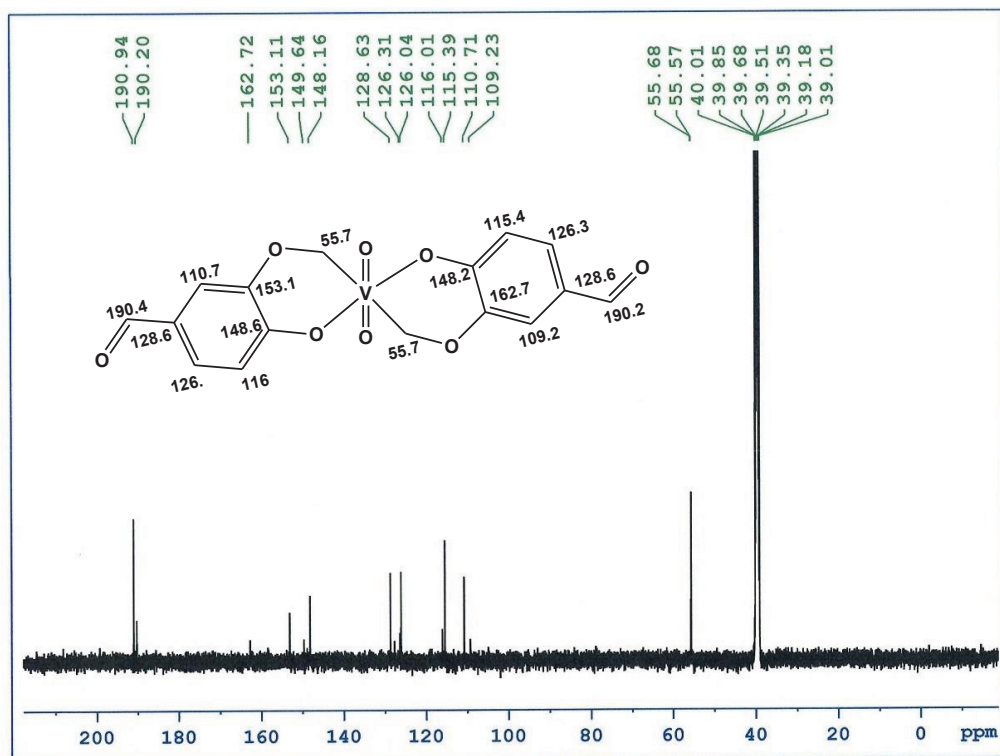

Supplementary Figure 32. <sup>13</sup>C NMR spectral patterns of VVA<sub>2</sub> and its plausible molecular structure

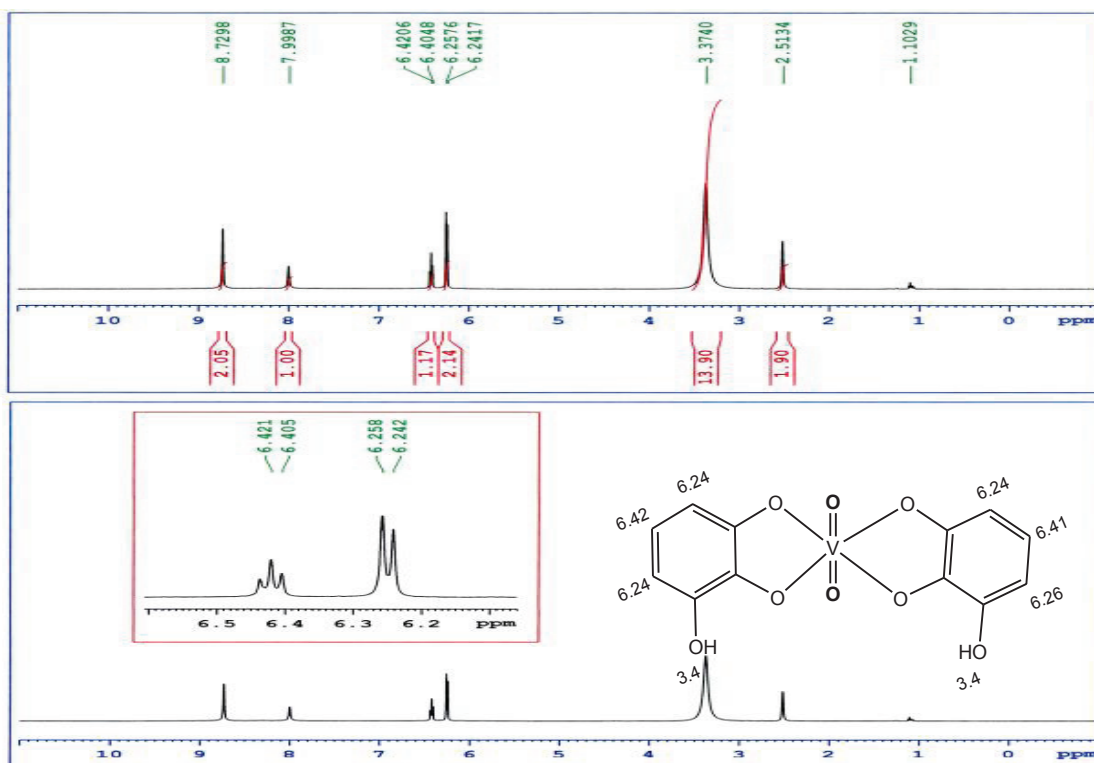

Supplementary Figure 33. <sup>1</sup>H NMR spectral patterns of VPYG<sub>2</sub>

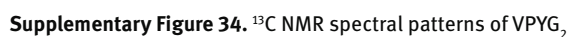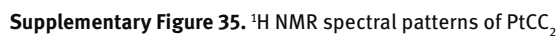

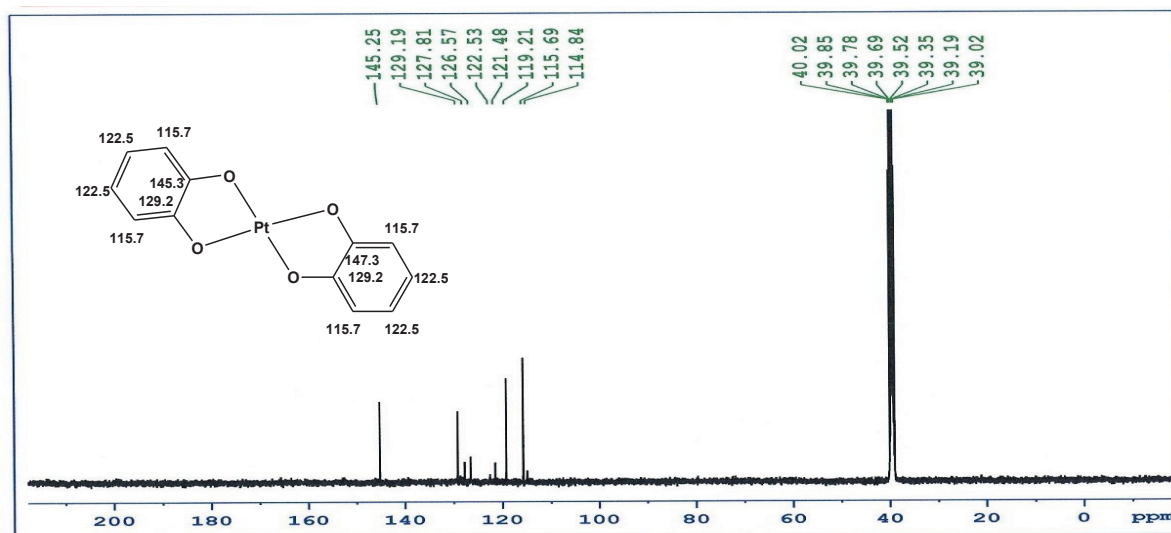Supplementary Figure 36. <sup>13</sup>C NMR spectral patterns of PtCC<sub>2</sub>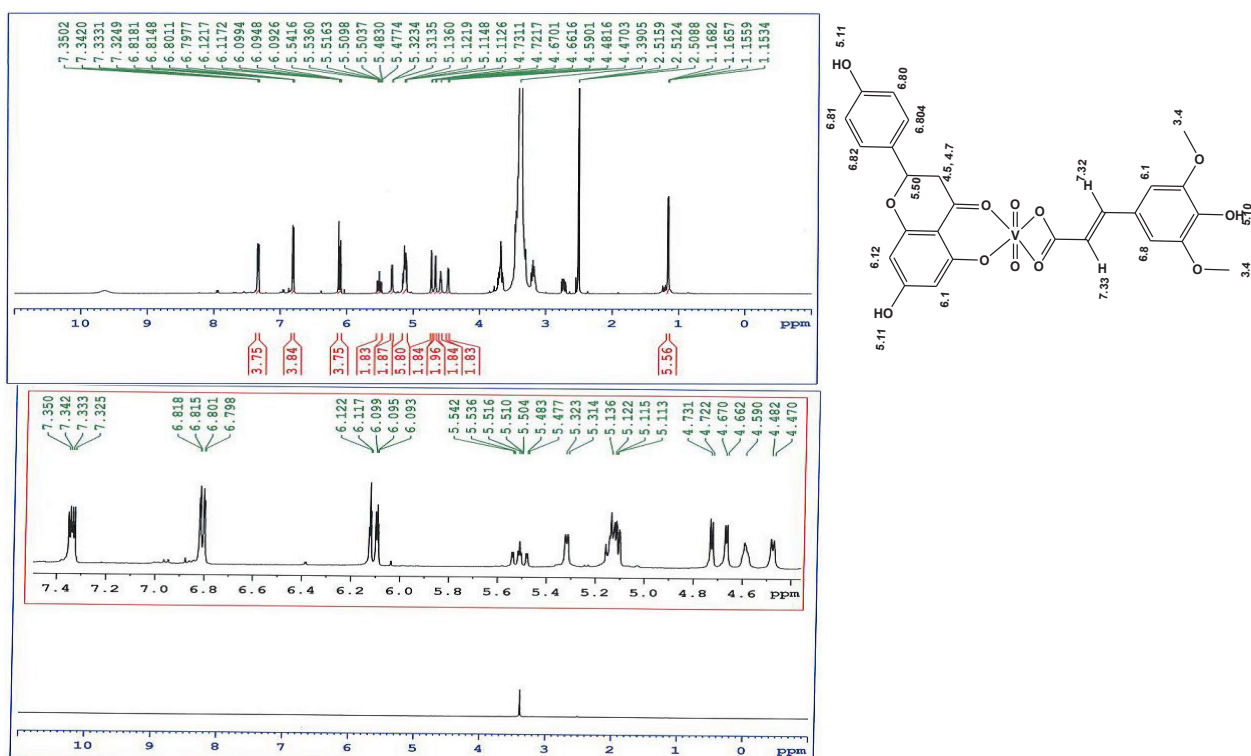Supplementary Figure 37. <sup>1</sup>H NMR spectral patterns of VNRGSA
